# Supplementary material for: Aqueous chemical bleaching of 4-nitrophenol brown carbon by hydroxyl radicals; products, mechanism and light absorptivity
Source: Copernicus journal article supplement (doi:10.5194/acp-2021-871), 2021-10-28
Supplement: Supplementary file [file acp-2021-871-AC1-supplement.pdf]

I hereby declare that the article entitled ‘Aqueous chemical bleaching of 4-nitrophenol brown carbon by hydroxyl radicals; products, mechanism and light absorption’ by Bartłomiej Witkowski, Priyanka Jain and Tomasz Gierczak has been proofread by a native speaker of English, a professional proofreader of academic articles.

Yours sincerely,

*Barbara Komorowska*

Translation Agency UZUS
